# Supplementary material for: Dendropanax trifidus Sap-Mediated Suppression of Obese Mouse Body Weight and the Metabolic Changes Related with Estrogen Receptor Alpha and AMPK-ACC Pathways in Muscle Cells
Source: MDPI journal article supplement (doi:10.3390/nu14051098), 2022-03-05
Supplement: s1 [file s1]

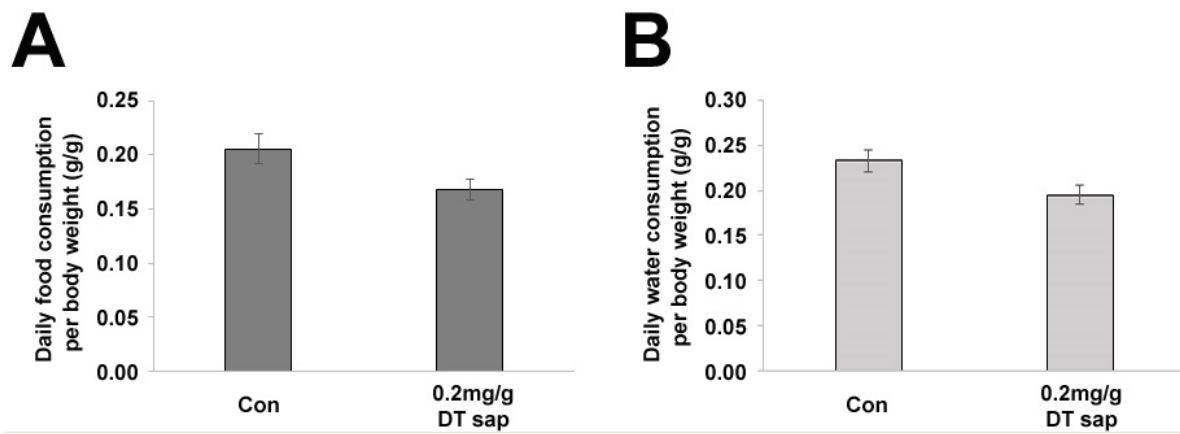

**Figure S1.** Average daily food or water consumption. Daily consumption of food (A) or water (B) was recorded and averaged after two weeks of daily oral administration of control vehicle or *Dendropanax Trifidus* sap (0.2 mg/g body weight). N = 3 mice per group. Bars indicate mean  $\pm$  S.E.M.
